# Supplementary material for: The brain and immune system prompt energy shortage in chronic inflammation and ageing
Source: Springer Nature journal article supplement (doi:10.1038/nrrheum.2017.172), 2017-10-12
Supplement: 41584_2017_BFnrrheum2017172_MOESM21_ESM.pdf [file 41584_2017_BFnrrheum2017172_MOESM21_ESM.pdf]

Supplementary Table 1 | Adaptive programmes in chronic inflammatory diseases and during ageing that protect against energy shortages

| Symptom(s)                                      | Chronic consequence(s)                                                             | Homeostasis                                                                                                                                                                                                                                         | Chronic inflammatory diseases and ageing                                                                                                                                                                                                                                                      |
|-------------------------------------------------|------------------------------------------------------------------------------------|-----------------------------------------------------------------------------------------------------------------------------------------------------------------------------------------------------------------------------------------------------|-----------------------------------------------------------------------------------------------------------------------------------------------------------------------------------------------------------------------------------------------------------------------------------------------|
| Daytime fatigue and low mood                    | Low levels of physical activity                                                    | <ul style="list-style-type: none"> <li>Reduces energy expenditure in the brain and muscles</li> <li>Confinement to a safe place and withdrawal from harmful situations</li> </ul>                                                                   | <ul style="list-style-type: none"> <li>Occurs frequently</li> <li>Pain and sleeping problems are the major drivers</li> </ul>                                                                                                                                                                 |
| Sleeping alterations                            | Low levels of physical and mental activity                                         | <ul style="list-style-type: none"> <li>Reduces energy expenditure in the brain and muscles</li> <li>Confinement to a safe place and withdrawal from harmful situations</li> </ul>                                                                   | Occurs frequently                                                                                                                                                                                                                                                                             |
| Loss of appetite and anorexia                   | Low appetite, malnutrition and muscle wasting                                      | <ul style="list-style-type: none"> <li>Reduces energy expenditure in the brain and muscles used for foraging</li> <li>Confinement to a safe place and withdrawal from harmful situations</li> </ul>                                                 | <ul style="list-style-type: none"> <li>Occurs frequently</li> <li>Consequence of sickness behaviour and low parasympathetic activity</li> </ul>                                                                                                                                               |
| Inflammation-induced anaemia                    | Low levels of physical activity                                                    | <ul style="list-style-type: none"> <li>Bacterial defence mechanism<sup>1</sup></li> <li>Reduces energy expenditure in the brain and muscles</li> <li>Confinement to a safe place and withdrawal from harmful situations</li> </ul>                  | Occurs frequently in chronic inflammatory diseases, in which iron is stored intracellularly as indicated by high levels of serum ferritin                                                                                                                                                     |
| Muscle wasting                                  | Low levels of physical activity, frailty and frequent falling                      | <ul style="list-style-type: none"> <li>Redistribution of glucogenic amino acids used as energy-rich fuels</li> <li>Reduces energy expenditure in the muscles</li> <li>Confinement to a safe place and withdrawal from harmful situations</li> </ul> | <ul style="list-style-type: none"> <li>Occurs frequently</li> <li>Consequence of anorexia, low levels of physical activity and the loss of anabolic hormones*</li> </ul>                                                                                                                      |
| Bone loss                                       | Fractures and low levels of physical activity                                      | Calcium, phosphate and magnesium liberated from the bone to supply non-skeletal tissue during anorexia                                                                                                                                              | <ul style="list-style-type: none"> <li>Occurs frequently</li> <li>Consequence of anorexia, low levels of physical activity, increased levels of cortisol and catecholamines<sup>‡</sup> and the loss of anabolic hormones*</li> </ul>                                                         |
| Insulin resistance                              | Hyperinsulinaemia drives inflammation and increases blood pressure                 | Redistribution of stored energy-rich fuels to the immune system or to the brain                                                                                                                                                                     | <ul style="list-style-type: none"> <li>Occurs frequently</li> <li>Consequence of inflammation in chronic inflammatory diseases and of inflammation or high levels of activity in the stress axes<sup>‡</sup> during ageing</li> <li>Consequence of low levels of physical activity</li> </ul> |
| Decreased fertility and loss of sexual interest | Low levels of physical activity and sexual dysfunction and loss of sexual interest | <ul style="list-style-type: none"> <li>Decreased courtship behaviour spares energy, causing muscle and bone loss</li> <li>Release of energy-rich fuels and calcium</li> </ul>                                                                       | <ul style="list-style-type: none"> <li>Occurs frequently</li> <li>Consequence of low levels of hypothalamus–pituitary–gonadal axis activity in chronic inflammatory diseases and low levels of hormones during ageing</li> </ul>                                                              |
| High blood pressure                             | Cardiovascular disease                                                             | Reduction of water loss; a typical sign of acute inflammation, wounding and haemorrhage                                                                                                                                                             | <ul style="list-style-type: none"> <li>Occurs frequently</li> <li>Consequence of high levels of activity in the sympathetic nervous and renin–angiotensin–aldosterone systems leading to water retention</li> </ul>                                                                           |
| Increased blood coagulation                     | Thrombosis and embolism                                                            | <ul style="list-style-type: none"> <li>Necessary after wounding and haemorrhage</li> <li>Reduces energy expenditure in erythropoiesis and prevents loss of energy-rich fuels through blood loss</li> </ul>                                          | <ul style="list-style-type: none"> <li>Occurs frequently</li> <li>Consequence of high activity of the sympathetic nervous and renin–angiotensin–aldosterone systems</li> </ul>                                                                                                                |

\*Anabolic hormones are androgens and oestrogens. In chronic inflammatory diseases, the hypothalamus–pituitary–gonadal axis is blocked, whereas during ageing, a natural decline in levels of these hormones occurs.

<sup>‡</sup>Stress axes are active in chronic inflammatory diseases and during ageing and favour the sympathetic nervous system over the hypothalamus–pituitary–adrenal axis.

References:

1. Weinberg, E. D. Iron availability and infection. *Biochim. Biophys. Acta* **1790**, 600–605 (2009).
